# Supplementary material for: Tailoring the optoelectronic properties and dielectric profiles of few-layer S-doped MoO3 and O-doped MoS2 nanosheets: a first-principles study
Source: Royal Society of Chemistry journal article supplement (doi:10.1039/d2cp03410g), 2022-01-01
Supplement: d2cp03410g1.pdf [file d2cp03410g1.pdf]

## Supporting Information

### Tailoring optoelectronic properties and dielectric profile of few-layers S-doped MoO<sub>3</sub> and O-doped MoS<sub>2</sub> nanosheets: a first-principles study

Masoud Shahrokhi <sup>1,2</sup>, Tangui Le Bahers <sup>1</sup>, and Pascal Raybaud<sup>1,2,\*</sup>

<sup>1</sup>*Univ Lyon, ENS de Lyon, CNRS, Université Claude Bernard Lyon 1,  
Laboratoire de Chimie UMR 5182, F-69342 Lyon, France*

<sup>2</sup>*IFP Energies nouvelles, Rond-point de l'échangeur de Solaize, BP 3, 69360 Solaize, France*

Corresponding author: [pascal.raybaud@ifpen.fr](mailto:pascal.raybaud@ifpen.fr)

## S1. Optoelectronic properties of non-doped 4L MoO<sub>3</sub> and O-doped 6L MoS<sub>2</sub>

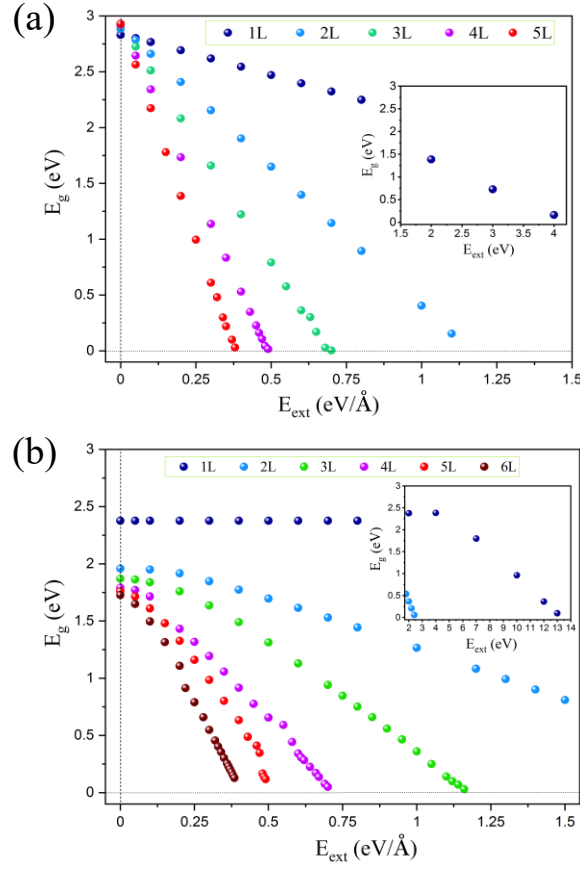

**Figure S1.** Calculated electronic band gap as a function of external electric field ( $E_{\text{ext}}$ ) along out-of-plane direction for 1L-5L MoO<sub>3</sub> (a) and 1L-6L MoS<sub>2</sub> (b) within HSE06. Insets show the electronic band gap of FL MoO<sub>3</sub> and MoS<sub>2</sub> as a function of strong electric field ( $E_{\text{ext}} > 1.5$  eV/Å).

The electronic band gap of MoO<sub>3</sub> and MoS<sub>2</sub> multilayers shows a monotonous decrease with increasing external electric field. Whereas the band gap of single-layer structures slightly decreases for electric field from 0 eV/Å to 1 eV/Å, it reduces drastically by applying stronger electric fields  $E_{\text{ext}} > 2$  eV/Å for SL MoO<sub>3</sub> and  $E_{\text{ext}} > 7$  eV/Å for SL MoS<sub>2</sub>.

As explained in Refs.<sup>1,2</sup>, the initial step of the microscopic dielectric profile calculation is a study of the variation of the total induced dipole ( $m_z$ ) of multilayer MoO<sub>3</sub> and MoS<sub>2</sub> systems as a function of the number of layers. According to Refs.<sup>1,2</sup>, it is expected that only for small external electric field, the

induced dipole have a linear variation as a function of  $E_{\text{ext}}$ . The slope of the inverse dipole variation as a function of  $1/L$  ( $L$  is array period between two layered slabs), is equal to  $1/(\epsilon_0 \cdot E_{\text{ext}})$ .

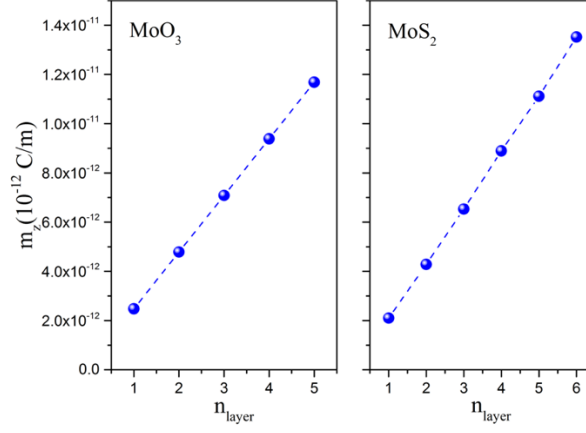

**Figure S2.** Variation of the induced dipole  $m_z$  for pristine MoO<sub>3</sub> and MoS<sub>2</sub> layered structures with increasing number of layers. The external electric field is  $E_{\text{ext}} = 0.025$  eV/Å.

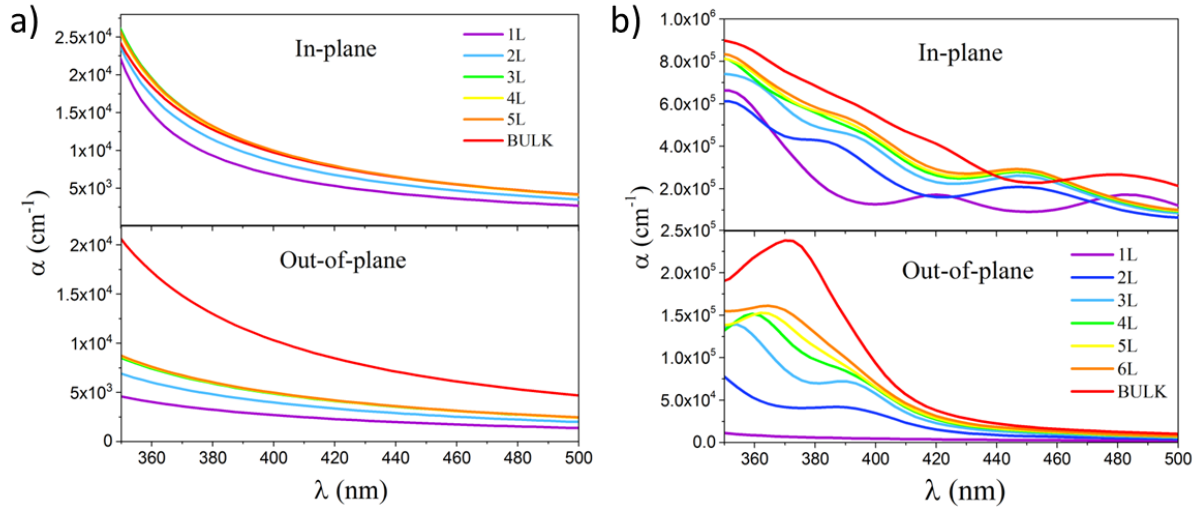

**Figure S3.** Computed absorption coefficients ( $\alpha$ , in  $\text{cm}^{-1}$ ) along in-plane and out-of-plane for a) 1L-5L and bulk MoO<sub>3</sub> and b) 1L-6L and bulk MoS<sub>2</sub> (right panel) within HSE06 approach.

## S2. S-doped 4L MoO<sub>3</sub> and O-doped 6L MoS<sub>2</sub>

### S2.1. Structural properties

| S concentration (%)               | System                                | corresponding cell | corresponding figure | <i>k</i> -point mesh | <i>a</i> (Å) | <i>b</i> (Å) | <i>T</i> (Å) | <i>E<sub>b</sub></i> (eV) | <i>E<sub>g</sub></i> (eV) | $\epsilon_{eff}$ |
|-----------------------------------|---------------------------------------|--------------------|----------------------|----------------------|--------------|--------------|--------------|---------------------------|---------------------------|------------------|
| 0.0                               | MoO <sub>3</sub>                      | unit cell          | Fig. S5 (a)          | 12×12×1              | 3.712        | 3.934        | 27.315       | -8.00                     | 2.92                      | 3.60             |
| 4.16 (bulk)                       | MoS <sub>0.12</sub> O <sub>2.88</sub> | unit cell          | Fig. S5 (b)          | 12×12×1              | 3.714        | 3.928        | 28.675       | -7.72                     | 1.48                      | 4.08             |
| 4.16 (edge)                       | MoS <sub>0.12</sub> O <sub>2.88</sub> | unit cell          | Fig. S5 (c)          | 12×12×1              | 3.714        | 3.930        | 27.737       | -7.75                     | 2.18                      | 3.96             |
| 8.33 (bulk-configure-1)           | MoS <sub>0.25</sub> O <sub>2.75</sub> | unit cell          | Fig. S5 (d)          | 12×12×1              | 3.715        | 3.933        | 29.342       | -7.46                     | 1.86                      | 4.99             |
| 8.33 (bulk-configure-2)           | MoS <sub>0.25</sub> O <sub>2.75</sub> | unit cell          | Fig. S5 (e)          | 12×12×1              | 3.716        | 3.924        | 30.00        | -7.43                     | 1.46                      | 5.14             |
| 8.33 (bulk-configure-3)           | MoS <sub>0.25</sub> O <sub>2.75</sub> | unit cell          | Fig. S5 (f)          | 12×12×1              | 3.716        | 3.925        | 29.92        | -7.44                     | 1.46                      | 5.15             |
| 8.33 (edge)                       | MoS <sub>0.25</sub> O <sub>2.75</sub> | unit cell          | Fig. S5 (g)          | 12×12×1              | 3.716        | 3.925        | 28.166       | -7.49                     | 2.16                      | 4.15             |
| 16.66 (bulk)                      | MoS <sub>0.5</sub> O <sub>2.5</sub>   | unit cell          | Fig. S5 (h)          | 12×12×1              | 3.713        | 3.934        | 29.52        | -6.88                     | 0.00                      | -----            |
| 16.66 (edge-pre-edge-configure-1) | MoS <sub>0.5</sub> O <sub>2.5</sub>   | unit cell          | Fig. S5 (i)          | 12×12×1              | 3.72         | 3.898        | 31.10        | -6.92                     | 0.65                      | 5.65             |
| 16.66 (bulk-edge-configure-2)     | MoS <sub>0.5</sub> O <sub>2.5</sub>   | unit cell          | Fig. S5 (j)          | 12×12×1              | 3.719        | 3.921        | 30.261       | -6.94                     | 1.85                      | 5.32             |
| 25                                | MoS <sub>0.75</sub> O <sub>2.25</sub> | unit cell          | Fig. S5 (k)          | 12×12×1              | 3.723        | 3.916        | 32.821       | -6.38                     | 1.44                      | 5.93             |
| 33                                | MoSO <sub>2</sub>                     | unit cell          | Fig. S5 (l)          | 12×12×1              | 3.724        | 3.922        | 34.306       | -5.86                     | 1.86                      | 7.51             |

Table S1. Different models, corresponding figures, *k*-point mesh, calculated optimized lattice parameters (*a* and *b*), calculated the layer thickness (*T*), binding energy (*E<sub>b</sub>*) per MoO<sub>3</sub>, the electronic band gap (*E<sub>g</sub>*) and effective high frequency dielectric constant ( $\epsilon_{eff}$ ) along out-of-plane direction for the S-substituted 4L MoO<sub>3</sub> for different concentrations.

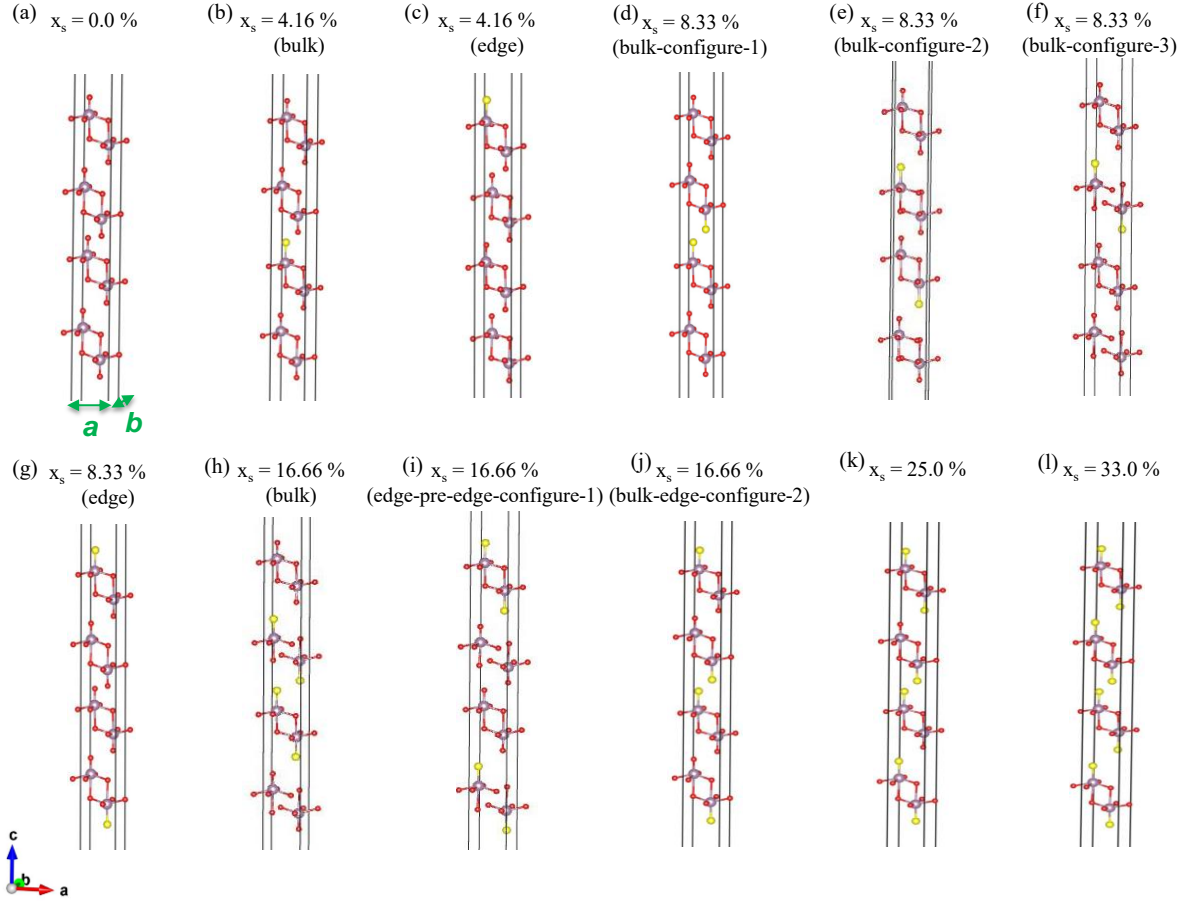

Figure S4. Optimized structures of S-doped 4L MoO<sub>3</sub> for different concentrations. The purple, red and yellow balls in the geometrical models represent the Mo, O and S atoms, respectively. The lattice parameters of pristine structure are also shown with green arrows.

| O concentration (%) | System                                | corresponding cell | corresponding figure | <i>k</i> -point mesh | <i>a</i> (Å) | <i>T</i> (Å) | <i>E<sub>b</sub></i> (eV) | <i>E<sub>g</sub></i> (eV) | <i>ε<sub>eff</sub></i> |
|---------------------|---------------------------------------|--------------------|----------------------|----------------------|--------------|--------------|---------------------------|---------------------------|------------------------|
| 0.0                 | MoS <sub>2</sub>                      | unit cell          | Fig. S6 (a)          | 12×12×1              | 3.156        | 33.860       | -2.250                    | 1.73                      | 6.26                   |
| 4.16 (bulk)         | MoO <sub>0.08</sub> S <sub>1.92</sub> | (2 × 2)            | Fig. S6 (b)          | 6×6×1                | 3.141        | 33.837       | -2.349                    | 1.21                      | 6.14                   |
| 4.16 (edge)         | MoO <sub>0.08</sub> S <sub>1.92</sub> | (2 × 2)            | Fig. S6 (c)          | 6×6×1                | 3.141        | 33.855       | -2.353                    | 1.27                      | 6.22                   |
| 8.33 (bulk)         | MoO <sub>0.17</sub> S <sub>1.83</sub> | (2 × 2)            | Fig. S6 (d)          | 6×6×1                | 3.125        | 33.810       | -2.453                    | 1.27                      | 6.00                   |
| 8.33 (edge)         | MoO <sub>0.17</sub> S <sub>1.83</sub> | (2 × 2)            | Fig. S6 (e)          | 6×6×1                | 3.125        | 33.889       | -2.458                    | 1.38                      | 6.13                   |
| 16.66               | MoO <sub>0.33</sub> S <sub>1.67</sub> | (2 × 2)            | Fig. S6 (f)          | 6×6×1                | 3.095        | 33.879       | -2.681                    | 1.48                      | 5.77                   |
| 25                  | MoO <sub>0.5</sub> S <sub>1.5</sub>   | (2 × 2)            | Fig. S6 (g)          | 6×6×1                | 3.065        | 33.845       | -2.923                    | 1.62                      | 5.35                   |
| 50                  | MoOS                                  | (2 × 2)            | Fig. S6 (h)          | 6×6×1                | 2.980        | 33.835       | -3.661                    | 1.75                      | 4.44                   |
| 75                  | MoO <sub>1.5</sub> S <sub>0.5</sub>   | (2 × 2)            | Fig. S6 (i)          | 6×6×1                | 2.890        | 31.290       | -4.482                    | 1.54                      | 3.78                   |

Table S2. Different models, corresponding figures, *k*-point mesh, calculated optimized lattice parameter (*a*), calculated the layer thickness (*T*), binding energy (*E<sub>b</sub>*) per MoS<sub>2</sub>, the electronic band gap (*E<sub>g</sub>*) and effective high frequency dielectric constant (*ε<sub>eff</sub>*) along out-of-plane direction for the O-substituted 6L MoS<sub>2</sub> for different concentrations.

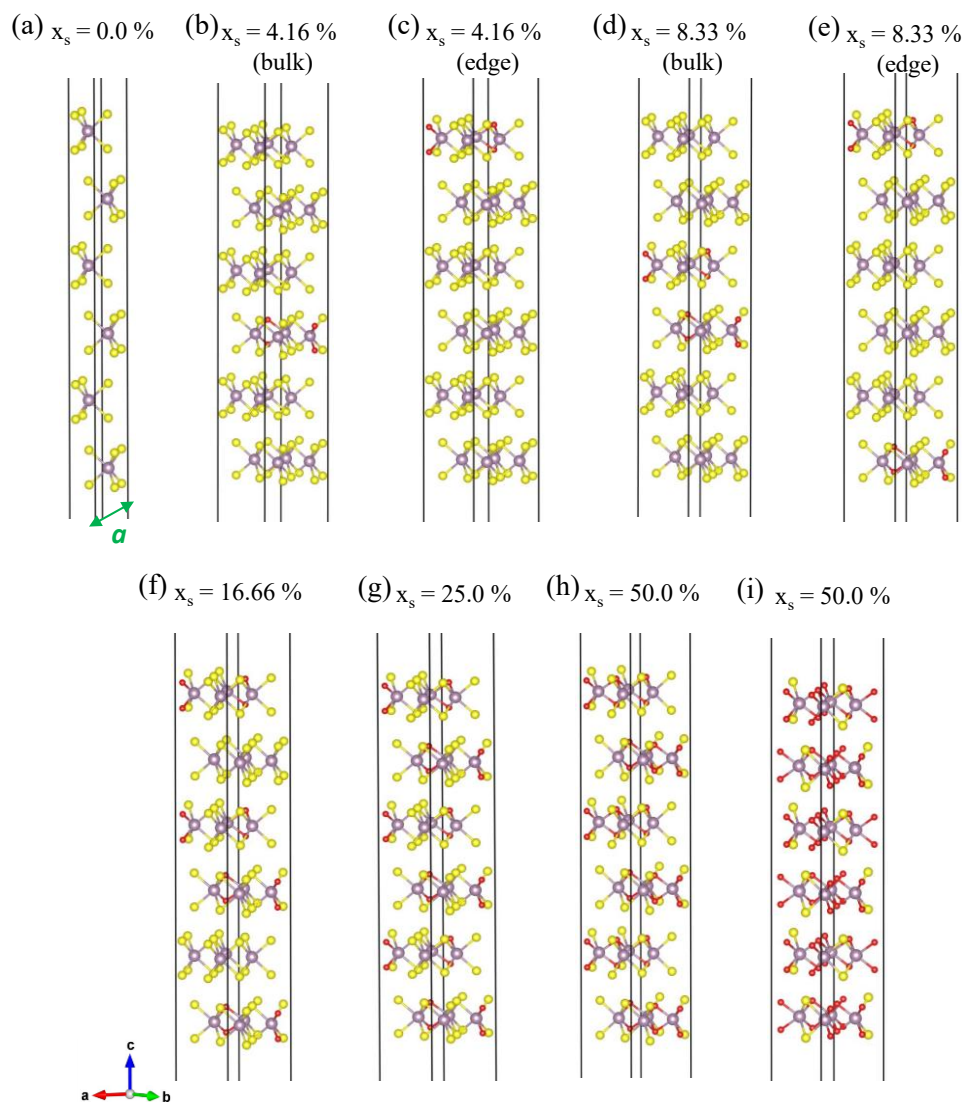

**Figure S5. Optimized structures of O-doped 6L MoO<sub>3</sub> for different concentrations.** The purple, red and yellow balls in the geometrical models represent the Mo, O and S atoms, respectively. The lattice parameters of pristine structure are also shown with green arrows.

## S2.2 Energetics and thermodynamic analysis

To evaluate the energetics of S-doped 4L MoO<sub>3</sub> structures, the binding energies ( $E_b$ ) normalized per MoO<sub>3</sub> were computed as

$$E_b = \frac{E_{tot} - (n_{Mo}E_{Mo} + (\frac{1}{2})n_OE_{O_2} + n_SE_{S_\alpha})}{N/4} \quad (1)$$

and the binding energies of O-doped 6L MoS<sub>2</sub> structures normalized per MoS<sub>2</sub> were computed as

$$E_b = \frac{E_{tot} - (n_{Mo}E_{Mo} + n_SE_{S_\alpha} + (\frac{1}{2})n_OE_{O_2})}{N/3} \quad (2)$$

where  $E_{tot}$  is the total energy per cell,  $E_i$  is the energy of the  $i$ -th individual elements in their respective ground states,  $n_i$  is the number of species  $i$  in the structure and  $N/4$  and  $N/3$  are the number of MoO<sub>3</sub> and MoS<sub>2</sub> per unit cell.

However, the binding energy cannot discriminate the relative stability of structures with various chemical compositions. Hence, to determine the thermodynamic stability of 4L MoO<sub>3-x</sub>S<sub>x</sub> and 6L MoS<sub>2-x</sub>O<sub>x</sub> compositions as a function of the number of S- or O-atoms exchanged in the 4L MoO<sub>3</sub> and 6L MoS<sub>2</sub> layered structures respectively, we calculate the Grand potential,  $\Omega$ , assuming that the reservoir surrounding the solids is constituted from ideal gas phase mixtures of H<sub>2</sub>S/H<sub>2</sub>O (commonly used experimentally as sulfiding and oxidizing agents):

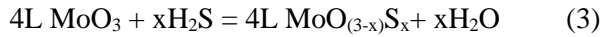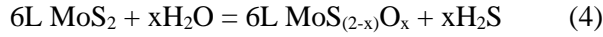

$$\Omega_{\text{MoO}_{3-x}\text{S}_x} = E_b(4L \text{ MoO}_{3-x}\text{S}_x) - E_b(4L \text{ MoO}_3) + xG_{f,T_0}^0(H_2O) - xG_{f,T_0}^0(H_2S) - xRT_0 \ln \left[ \frac{p(H_2S)}{p(H_2O)} \right] \quad (5)$$

$$\Omega_{\text{MoS}_{2-x}\text{O}_x} = E_b(6L \text{ MoS}_{2-x}\text{O}_x) - E_b(6L \text{ MoS}_2) + xG_{f,T_0}^0(H_2S) - xG_{f,T_0}^0(H_2O) - xRT_0 \ln \left[ \frac{p(H_2O)}{p(H_2S)} \right] \quad (6)$$

where  $E_b$  stands for the 0 K, binding energies of the different solids involved (neglecting vibrational and entropic contributions, see also supporting information),  $G_{f,T_0}^0$  stands for the Gibbs free energies of formation of H<sub>2</sub>S and H<sub>2</sub>O molecules (including thermal and entropic effects evaluated from NIST data base at T<sub>0</sub>=298 K). So, for each value of x, we will plot the evolution of  $\Omega_x$  as a function of the variable  $\pm RT_0 \ln \left[ \frac{p(H_2O)}{p(H_2S)} \right]$  fixing the partial pressures of H<sub>2</sub>S/H<sub>2</sub>O in the reservoir assumed at T<sub>0</sub>=298 K. It is worth to note that increasing T slightly diminishes (increases, respectively) the free enthalpy of oxidation (sulfidation, respectively) reaction. However, the main trends reported at ambient T are only very weakly affected.

For the more discerning of the stability of these structures, we calculated the reaction energies for the most stable S-substituted 4L MoO<sub>3</sub> and O-substituted 6L MoS<sub>2</sub> nanostructures for different concentrations by using equations S3 and S4 as depicted in Fig 4. In this figure,  $\Delta E$  is the difference of

0K binding energy of the S-substituted 4L MoO<sub>3</sub> and O-substituted 6L MoS<sub>2</sub> systems with respect to DFT binding energies of H<sub>2</sub>S and H<sub>2</sub>O as reactants/products:

$$\Delta E = E_b(4L MoO_{3-x}S_x) - E_b(4L MoO_3) + xE_b(H_2O) - xE_b(H_2S) \quad (7)$$

$\Delta G$  is the difference of binding energy of the S-substituted 4L MoO<sub>3</sub> and O-substituted 6L MoS<sub>2</sub> systems with respect to experimental free energies (enthalpy and entropy) of H<sub>2</sub>S and H<sub>2</sub>O given by NIST thermodynamic database:

$$\Delta G = E_b(4L MoO_{3-x}S_x) - E_b(4L MoO_3) + xG_b(H_2O) - xG_b(H_2S) \quad (8)$$

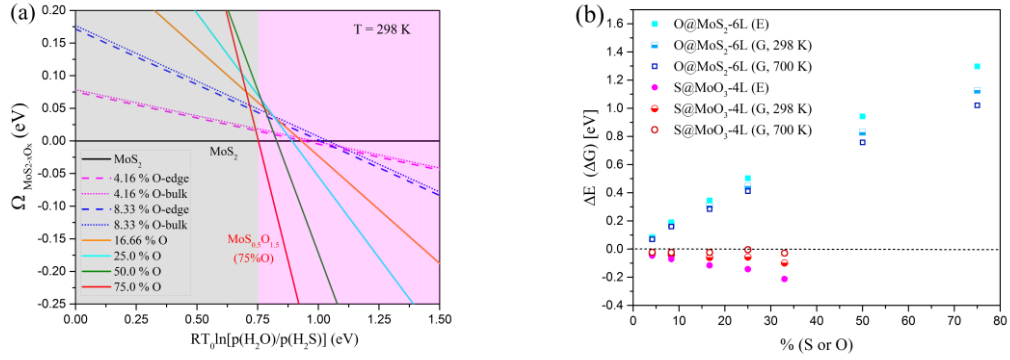

**Figure S6. Thermodynamic phase stability of the O-substituted 6L MoS<sub>2</sub> (a) structures for different S- and O-concentrations with respect to pristine structures considering the H<sub>2</sub>S/H<sub>2</sub>O reservoir. The dashed and dotted lines denote the results for impurity-substituted only in the edge and bulk of layered systems, respectively. (b) The calculated reaction energy for the most stable S-substituted 4L MoO<sub>3</sub> and O-substituted 6L MoS<sub>2</sub> structures for different concentrations.**

## S2.3 Electronic structure

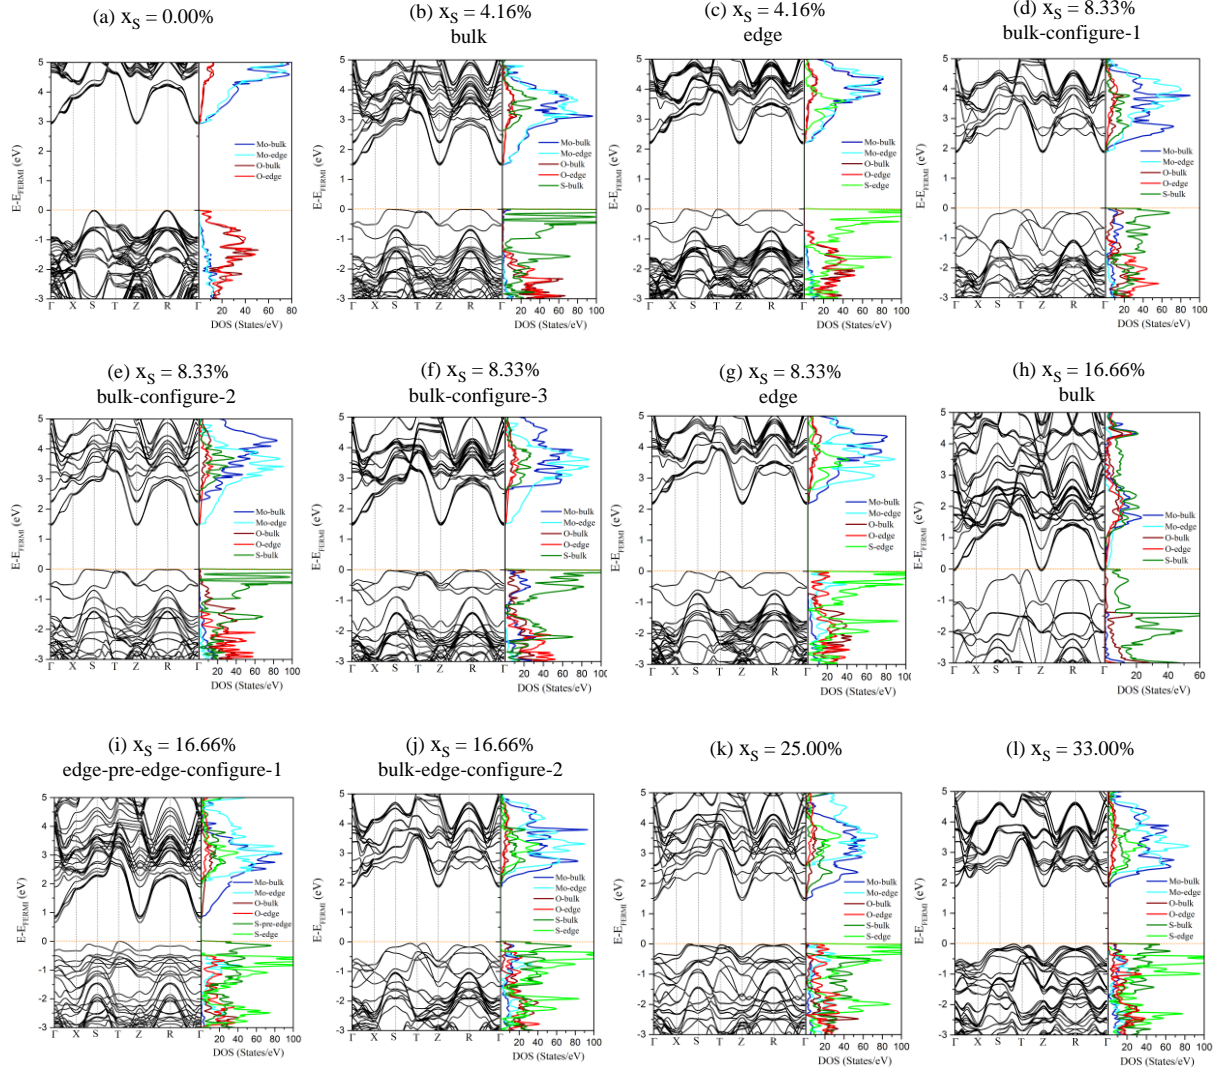

**Figure S7.** Band structure and PDOS of the most stable S-substituted 4L MoO<sub>3</sub> structures for different concentrations calculated using HSE06. The Fermi level is set to zero. The related structures are presented in Figure S4.

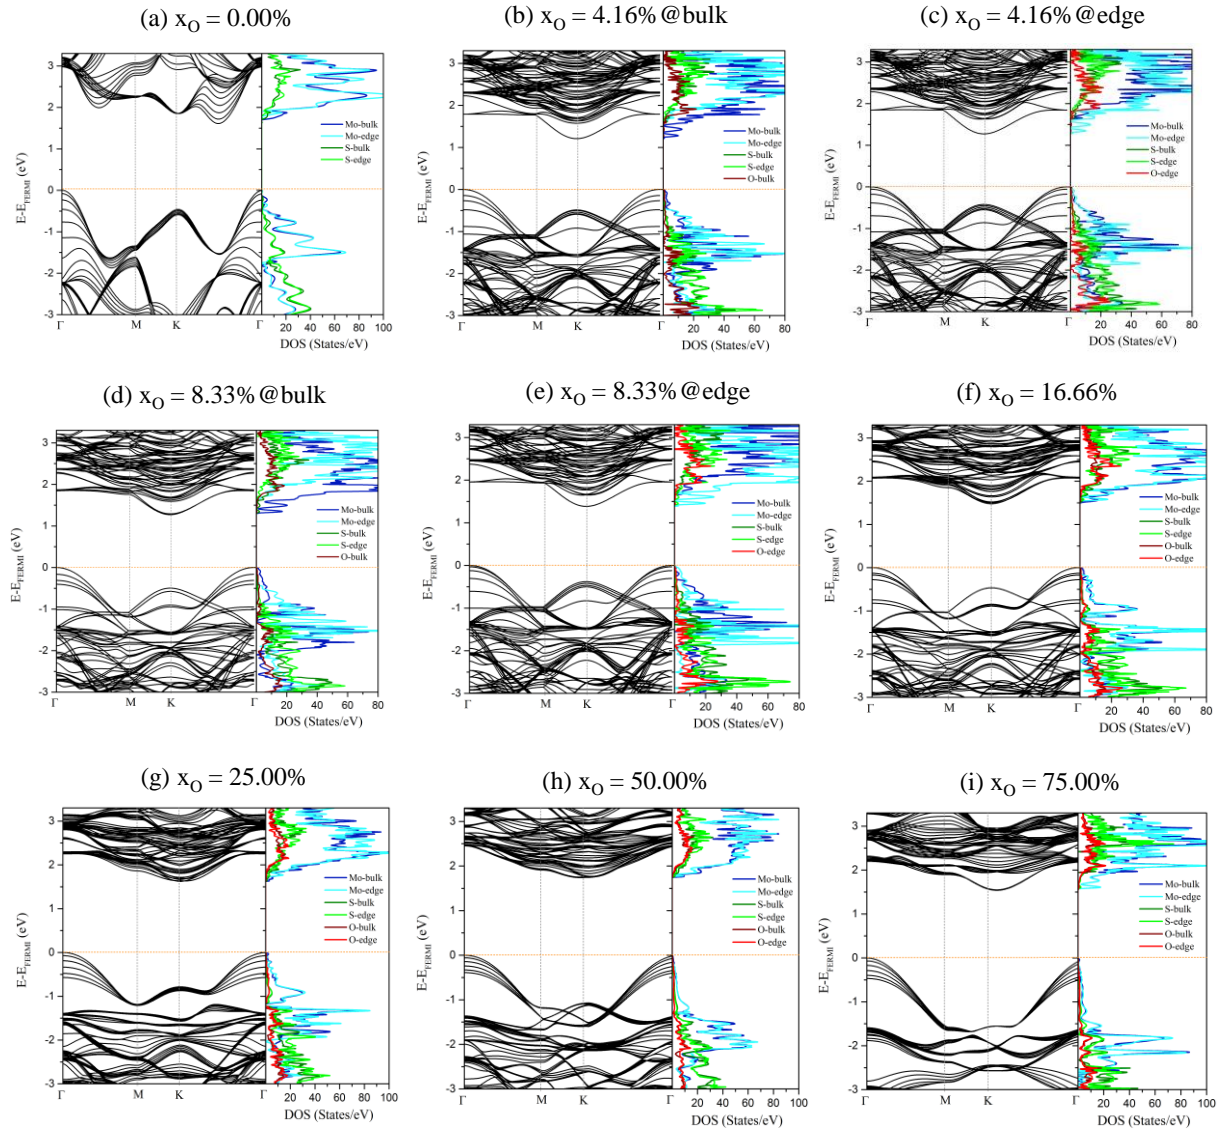

**Figure S8.** Band structure and PDOS of the most stable O-substituted 6L MoS<sub>2</sub> structures for different concentrations calculated using HSE06. The Fermi level is set to zero. The related structures are presented in Figure S5.

## References

- 1 J. Even, L. Pedesseau and M. Kepenekian, Electronic surface states and dielectric self-energy profiles in colloidal nanoscale platelets of CdSe, *Phys. Chem. Chem. Phys.*, 2014, **16**, 25182–25190.
- 2 F. Giustino, P. Umari and A. Pasquarello, Dielectric Discontinuity at Interfaces in the Atomic-Scale Limit: Permittivity of Ultrathin Oxide Films on Silicon, *Phys. Rev. Lett.*, 2003, **91**, 267601.
